# Supplementary material for: Superior antibacterial activity of Fe3O4@copper(ii) metal–organic framework core–shell magnetic microspheres
Source: Royal Society of Chemistry journal article supplement (doi:10.1039/d0dt02417a), 2020-01-01
Supplement: d0dt02417a1.pdf [file d0dt02417a1.pdf]

**Supplementary Information for**

**Superior Antibacterial Activity of Fe<sub>3</sub>O<sub>4</sub>@Copper (II)  
Metal-organic Framework Core-shell Magnetic  
Microspheres**

*Siqi Zhang<sup>a</sup>, Junwei Ye<sup>\*a</sup>, Zhao Liu<sup>a</sup>, Hao Lu<sup>a</sup>, Suqi Shi<sup>a</sup>, Ye Qi<sup>a</sup>, Guiling Ning<sup>\*a</sup>*

<sup>a</sup> State Key Laboratory of Fine Chemicals, School of Chemical Engineering, Dalian University of Technology, 2 Linggong Road, Dalian, Liaoning, 116024, PR China.

**\*Corresponding author**

Email Address: junweiye@dlut.edu.cn (J. W. Ye), ninggl@dlut.edu.cn (G. L. Ning).

**Materials and characterization.** All commercial chemicals are of analytical grade and were used without further purification. The morphology of the samples were characterized by a Tescan Vega3 scanning electron microscope (SEM). The crystalline structure was determined by Rigaku-DMax 2400 X-ray diffraction (XRD) system. TEM images were obtained using a Philips Tecnai G2 20 transmission electron microscope. Thermo gravimetric analysis (TGA) was performed on a Mettler Toledo TGA/DSC3+ instrument to measure the weigh loss curves at a heating rate of 10°·min<sup>-1</sup> under an air atmosphere. The infrared spectroscopy (IR) spectra was acquired on a Bruker IFS 66 V interferometer One FTIR spectrophotometer. The UV-vis spectra were recorded on Lambda 750S ultraviolet spectrophotometer. ICP analysis was

conducted on inductively coupled plasma emission spectrometer (Optima2000DV,  
Perkinelmer).

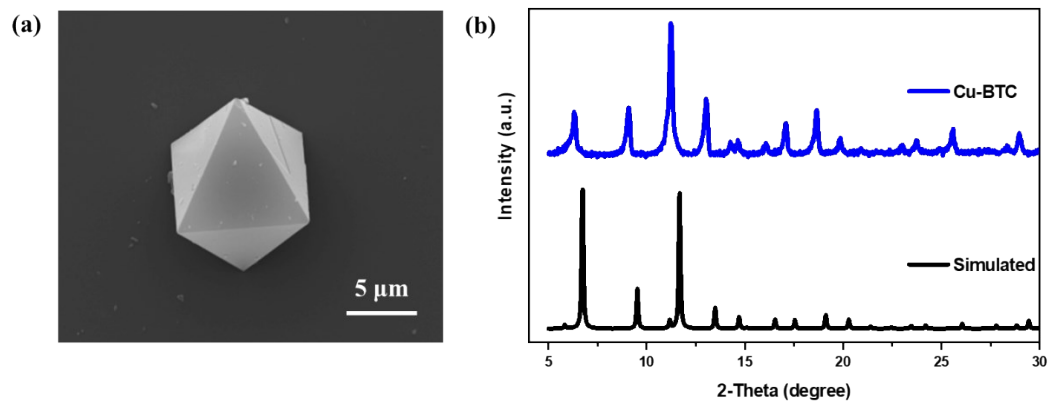

**Fig. S1** SEM image and XRD patterns of Cu-BTC crystals

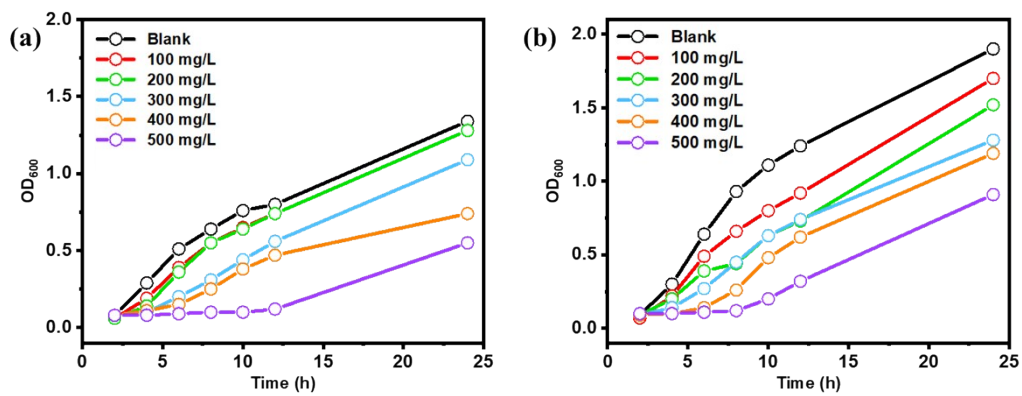

**Fig. S2** Growth curve of Cu-BTC against (a) *E. coli* and (b) *S. aureus*.

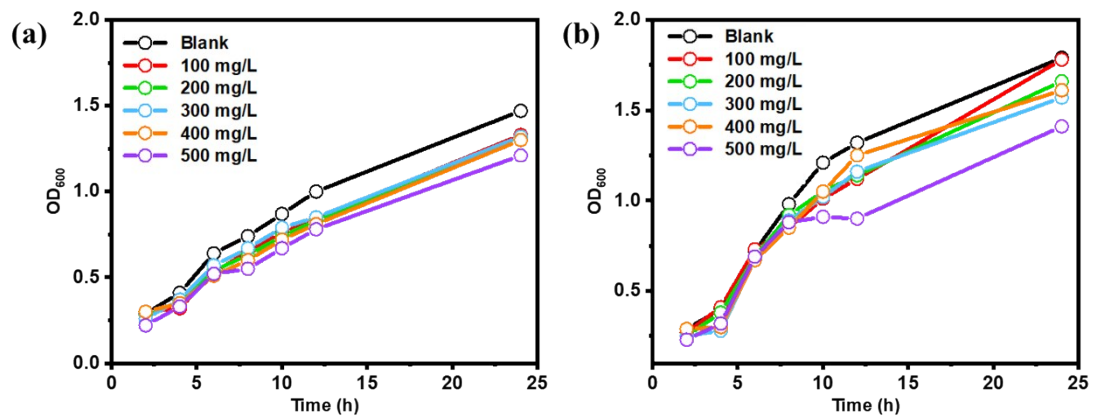

Fig. S3 Growth curve of  $\text{Fe}_3\text{O}_4$  against (a) *E. coli* and (b) *S. aureus*.

**Table S1.** Summary of antibacterial action of reported copper-based MOFs composites

| MOFs composites                                                    | Metal | Microbial strains                   | Antibacterial effect                                                                                                                               | Refs      |
|--------------------------------------------------------------------|-------|-------------------------------------|----------------------------------------------------------------------------------------------------------------------------------------------------|-----------|
| Cu-H <sub>2</sub> bpdC-Gu                                          | Cu    | <i>P. aeruginosa</i>                | MIC=500 mg/L                                                                                                                                       | 1         |
| [Cu(TDC)(H <sub>2</sub> O) <sub>2</sub> ] $\cdot$ H <sub>2</sub> O | Cu    | <i>E. coli</i> and <i>S. aureus</i> | <i>E. coli</i> : MIC=150~200 mg/L.<br><i>S. aureus</i> MIC=150~200 mg/L                                                                            | 2         |
| CuBTC-silk fiber                                                   | Cu    | <i>E. coli</i> and <i>S. aureus</i> | Inhibition zone: <i>E. coli</i> =10 mm, <i>S. aureus</i> =27 mm                                                                                    | 3         |
| CuBTC-cellulosic fiber                                             | Cu    | <i>E. coli</i>                      | Total growth inhibition in liquid cultures and on contact area on agar plates                                                                      | 4         |
| Cu <sub>3</sub> (NH <sub>2</sub> BTC) <sub>2</sub> -cotton         | Cu    | <i>E. coli</i>                      | Resulting in a 4-log reduction after 24 h exposure                                                                                                 | 5         |
| AC-HKUST-1                                                         | Cu    | <i>P. aeruginosa</i>                | MIC=50 mg/L                                                                                                                                        | 6         |
| CuS@HKUST-1                                                        | Cu    | <i>E. coli</i> and <i>S. aureus</i> | Antibacterial efficacy: 99.7 % within 20 min NIR irradiation                                                                                       | 7         |
| Fe <sub>3</sub> O <sub>4</sub> @Cu-BTC                             | Cu    | <i>E. coli</i> and <i>S. aureus</i> | <i>E. coli</i> ( <i>S. aureus</i> ): Antibacterial efficacy of 97.4% (97.5%) at the concentration of 500 mg/L (400 mg/L) after 24 h cocultivation. | This work |

## References

1. F. Abbasloo, S. A. Khosravani, M. Ghaedi, K. Dashtian, E. Hosseini, L. Manzouri, S. S. Khorramrooz, A. Sharifi, R. Jannesar and F. Sadri, *Ultrason. Sonochem.*, 2018, **42**, 237-243.
2. A. Rauf, J. Ye, S. Zhang, L. Shi, M. A. Akram and G. Ning, *Polyhedron*, 2019, **166**, 130-136.
3. A. R. Abbasi, K. Akhbari and A. Morsali, *Ultrason. Sonochem.*, 2012, **19**, 846-852.
4. H. S. Rodriguez, J. P. Hinestroza, C. Ochoa-Puentes, C. A. Sierra and C. Y. Soto, *J. Appl. Polym. Sci.*, 2014, **131**, 40815.
5. H. N. Rubin, B. H. Neufeld and M. M. Reynolds, *ACS Appl. Mater. Interfaces*, 2018, **10**, 15189-15199.
6. F. N. Azad, M. Ghaedi, K. Dashtian, S. Hajati and V. Pezeshkpour, *Ultrason. Sonochem.*, 2016, **31**, 383-393.
7. P. Yu, Y. Han, D. Han, X. Liu, Y. Liang, Z. Li, S. Zhu and S. Wu, *J. Hazard. Mater.*, 2020, **390**, 122126.
